# Supplementary material
Source: MDPI journal article supplement (https://www.mdpi.com/2071-1050/15/10/7742)
Supplement: s1 [file s1]

## **Supplementary Data:**

# **Abandonment of cropland and seminatural grassland in a mountainous traditional agricultural landscape in Japan**

**Nobuo Imai <sup>1†</sup>, Hinata Otokawa <sup>1†</sup>, Atsumi Okamoto <sup>1,2</sup>, Kaito Yamazaki <sup>1,3</sup>, Takuya Tamura <sup>1</sup>, Tsubasa Sakagami <sup>1</sup>, Shingo Ishizaka <sup>4</sup>, Hijiri Shimojima <sup>1\*</sup>**

<sup>1</sup> Faculty of Regional Environmental Science, Tokyo University of Agriculture, Sakuragaoka 1-1-1, Setagaya-ku, Tokyo 156-8502, Japan

<sup>2</sup> Toyota City Museum of Local History, Jinnakacho 1-21-2, Toyota, Aichi 471-0079, Japan

<sup>3</sup> Japan Wildlife Research Center, Kotobashi 3-3-7, Sumida-ku, Tokyo 130-8606, Japan

<sup>4</sup> NPO tama genryu Kosuge, Kosuge 1911, Kitatsuru-gun, Yamanashi 401-0211, Japan

Correspondence: e-mail: h3shimoi@nodai.ac.jp

† Equally contributed first authors (Imai N, Otokawa H)

Figure S1. Historical photographs of the area around Kosuge. Photo credit: Tokyo Waterworks Historical Museum.

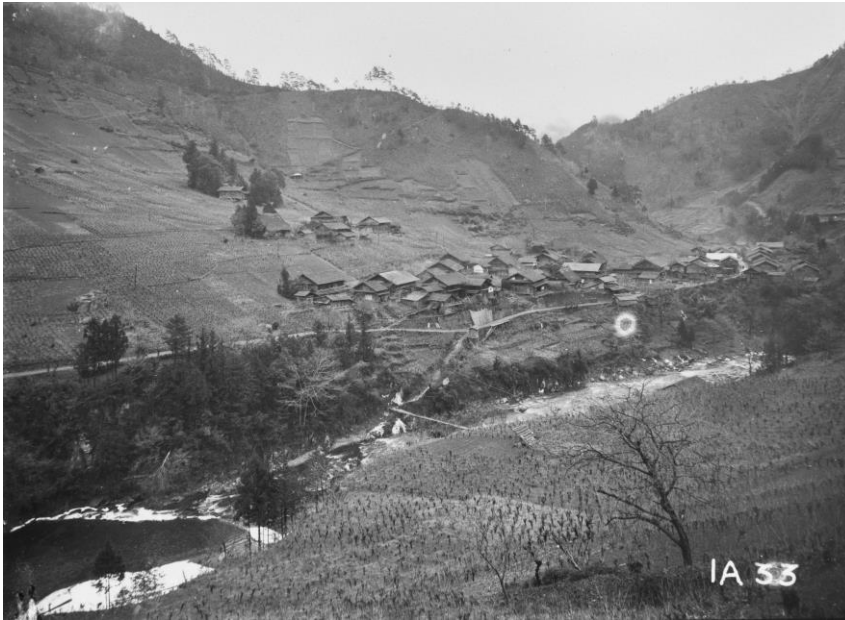

a) A typical landscape from a traditional mountain village in the past. Croplands are set directly on the steep slopes without terracing. Ogouchi, Tokyo in January 1938.

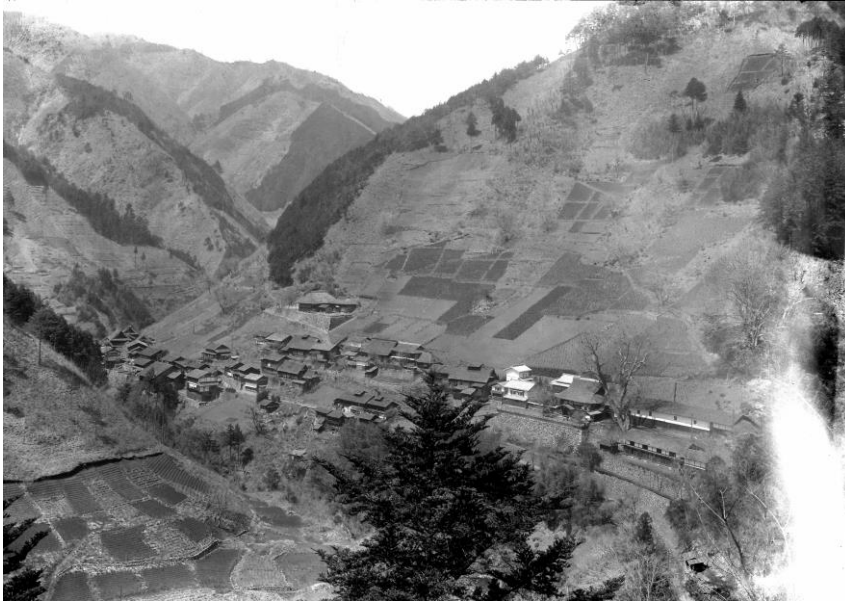

b) As above. Ogouchi, Tokyo. Year unknown.

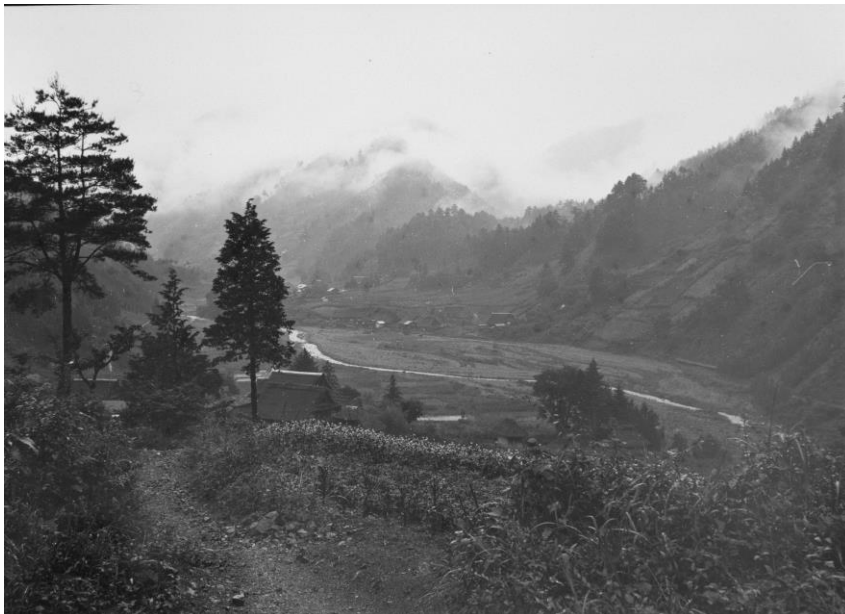

c) As above. The current location of the village office of Kosuge, Yamanashi in June 1938.

Figure S1. Continued.

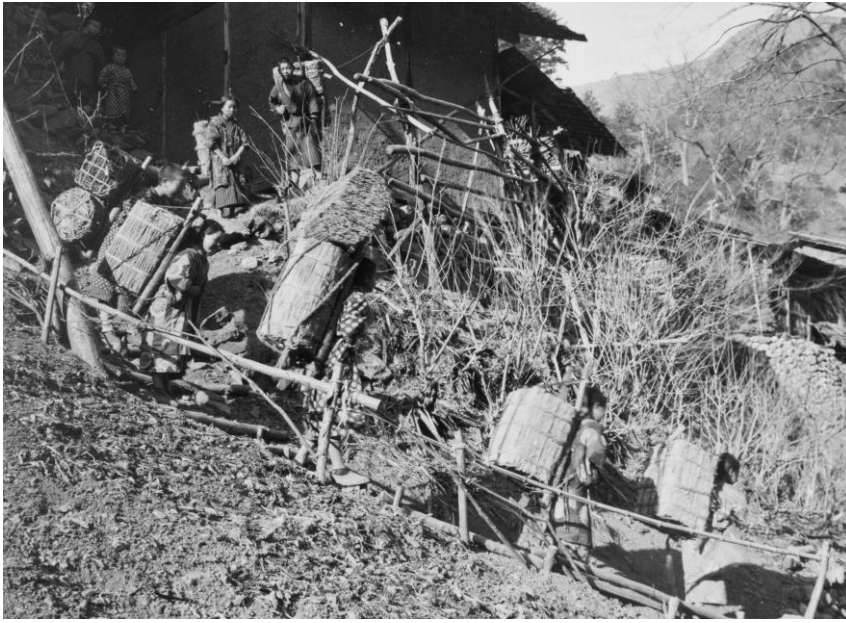

d) Children carrying charcoal.  
Tabayama, Yamanashi in January  
1938.

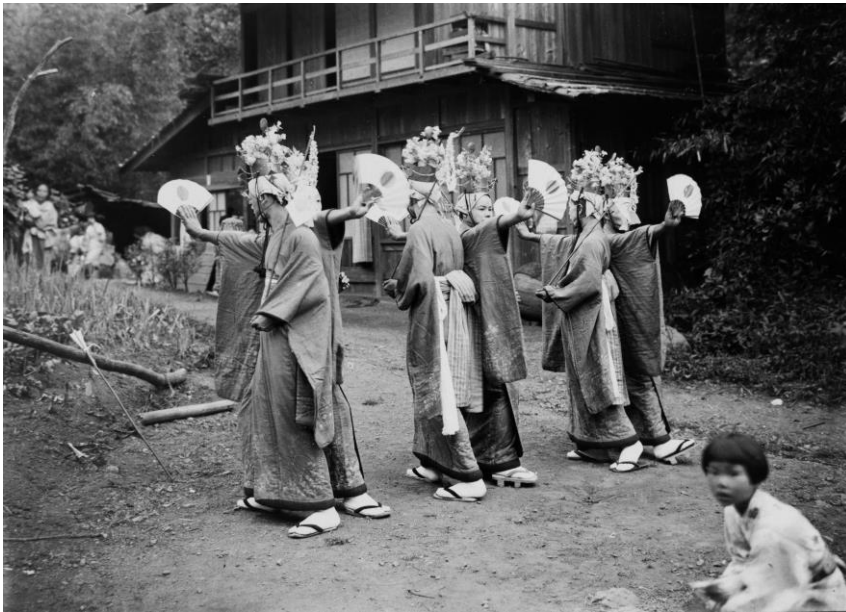

e) Traditional mountainous villages  
have preserved irreplaceable culture.  
A local ethnic dance, *Kashima Odori*,  
in Ogouchi, Tokyo in September  
1939.

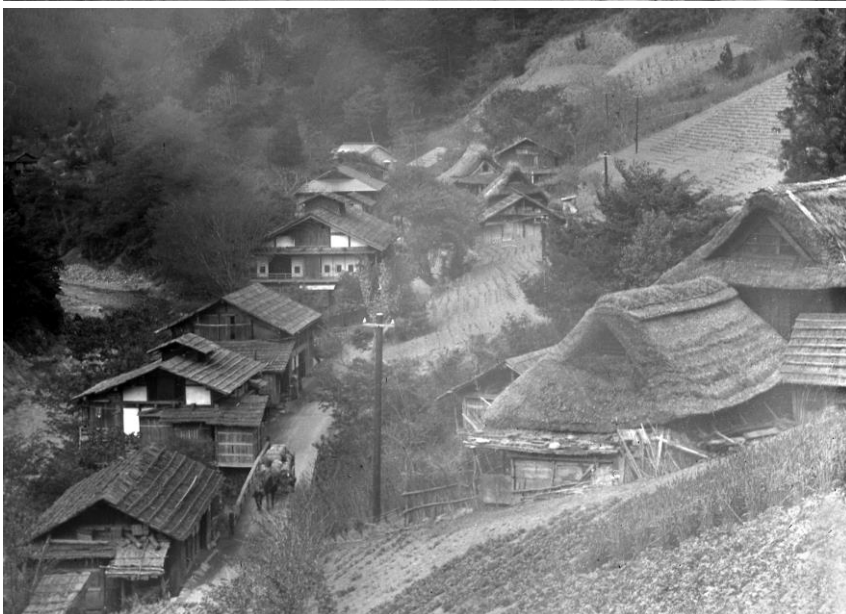

f) Thatched-roof houses (right side of  
photograph) constructed from the  
genus *Miscanthus* (Poaceae) in  
Ogouchi, Tokyo in November 1936.



Figure S2. Views of traditional agricultural landscape in Kosuge, Yamanashi Prefecture, Japan. Photo credits: (a, b, e) S. Ishizaka and (c, d, f) A. Okamoto.

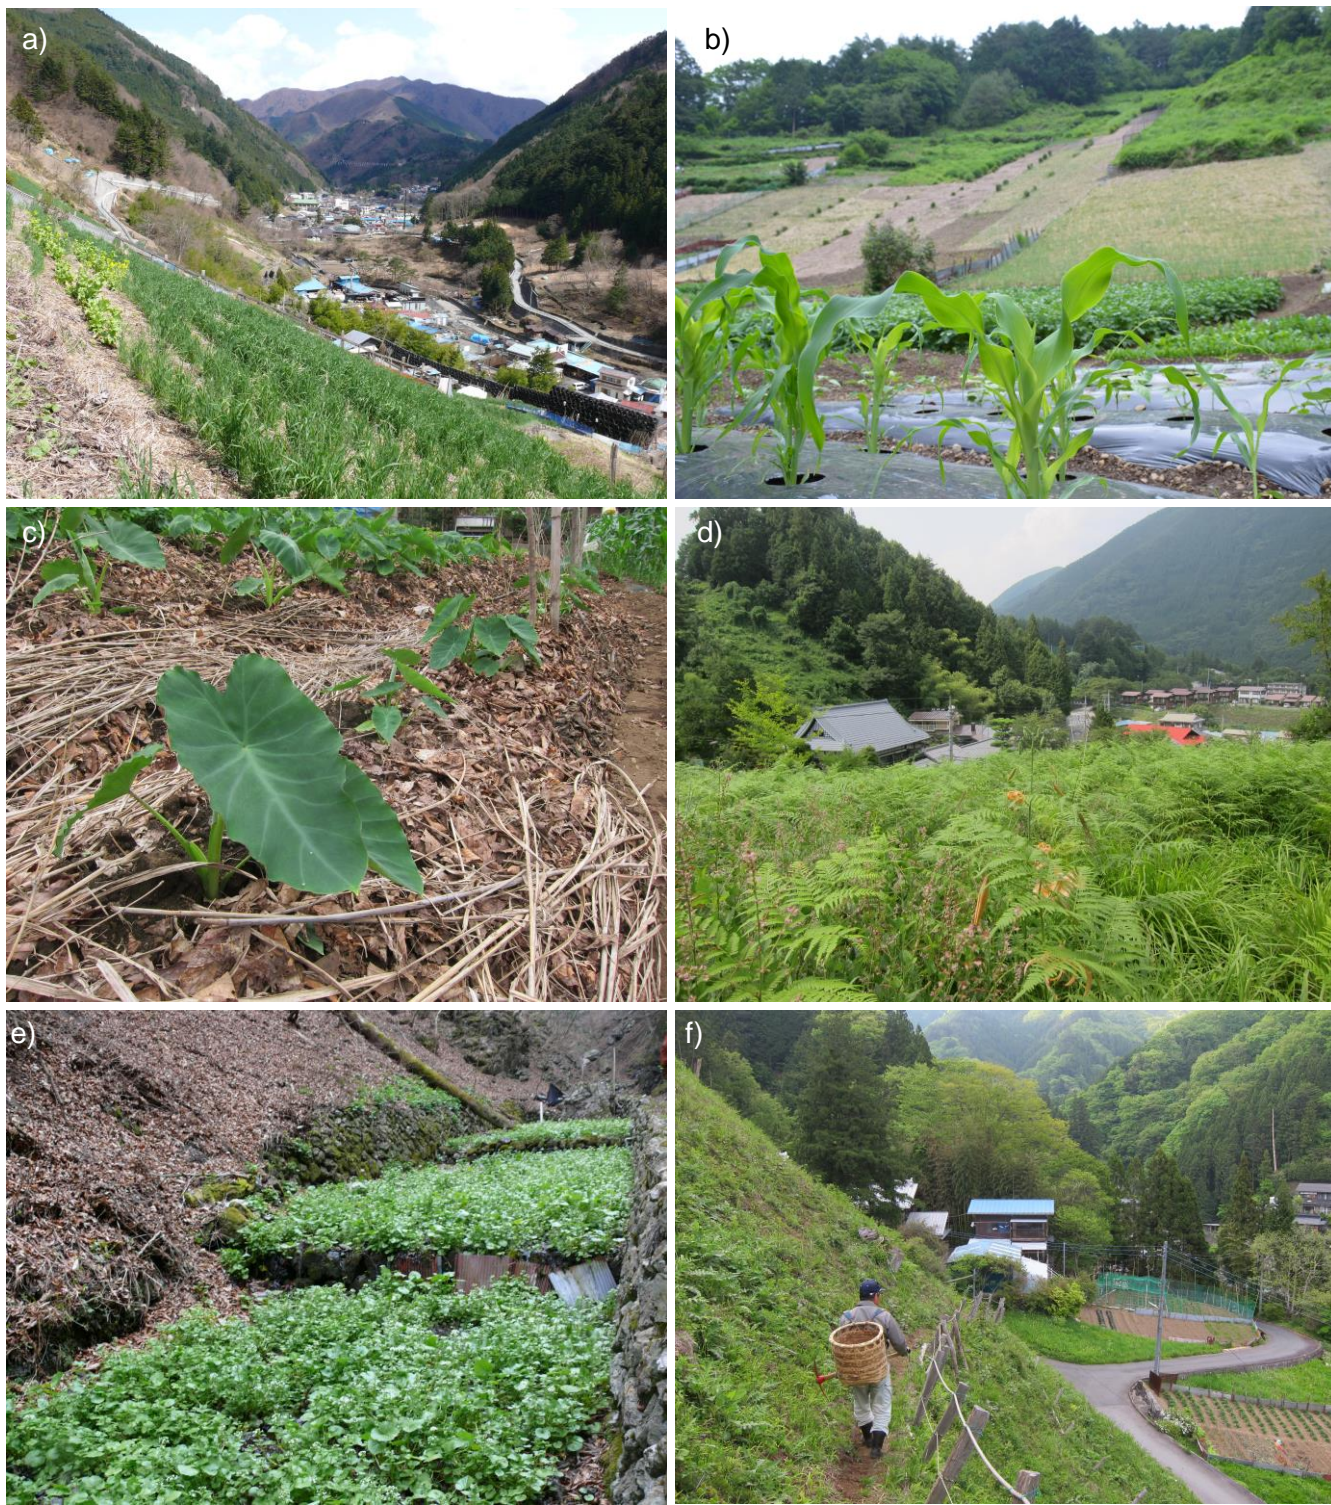

Figure S3. Change in demographics and land use in Kosuge, Yamanashi Prefecture, Japan.  
(References in Text S1.)

a) Change in demographics in Kosuge. The numbers of residents, households, people per household, and percentage of the population aged over 65 are shown.

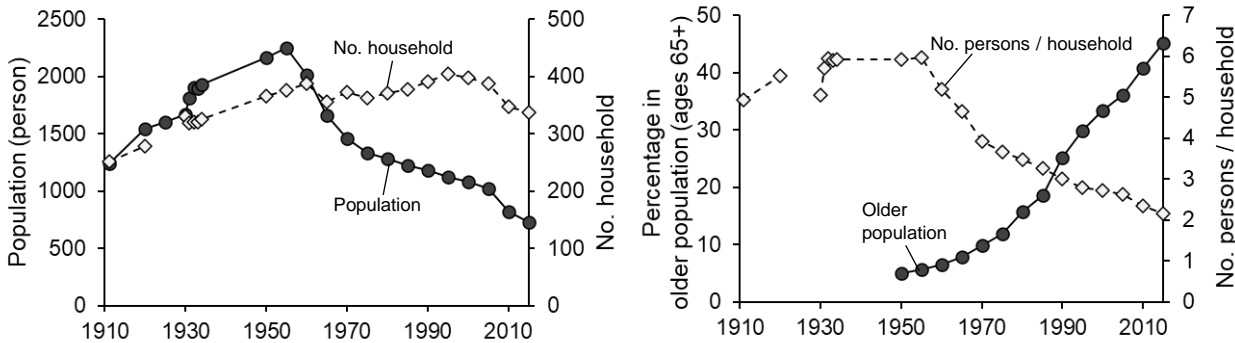

b) Changes in the area of cropland, paddy fields, orchards, and mulberry (the primary food of silkworms) in Kosuge.

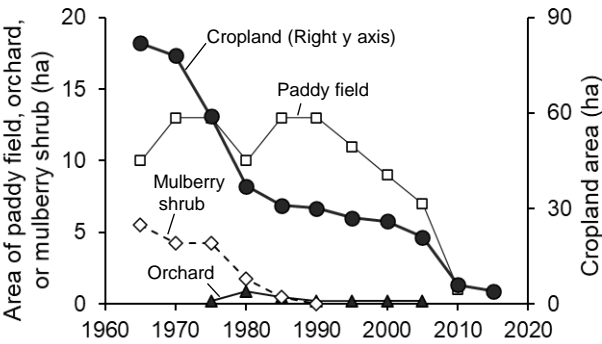

c) Change in the area of coniferous plantation in Kosuge.

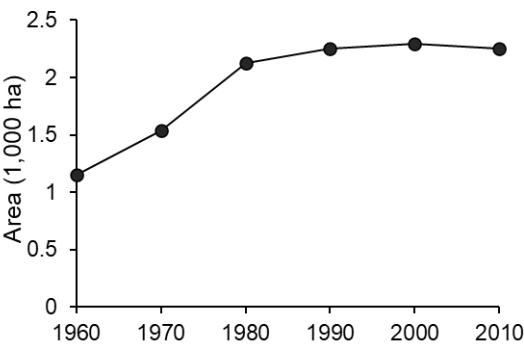

d) Changes in demographics in the four settlements. The numbers of residents and households are shown.

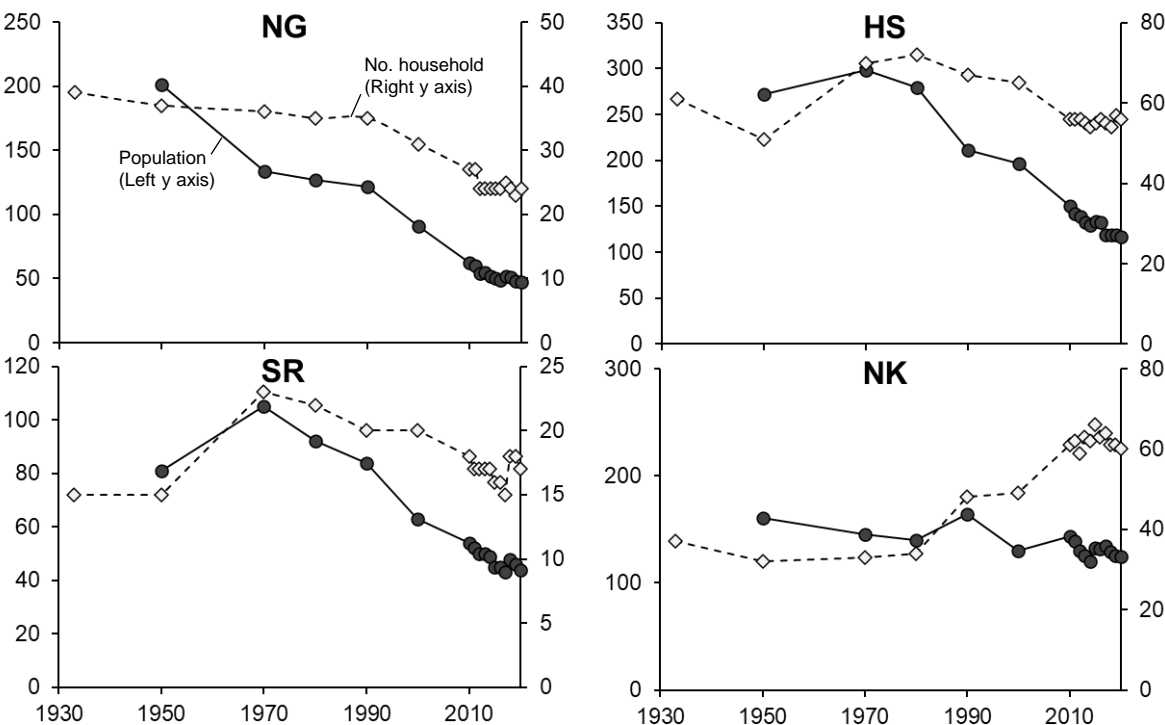



Figure S4. Maps used for spatial analysis of (a) NG, (b) HS, (c) SR, and (d) NK. Upper panel: slope aspect, mid-high panel: slope angle, mid-low panel: the nearest entrance points from the residential area to the block, and the centre of each parcel. Lower panel: aerial photos taken by UAV.

a) NG (Nagasaki)

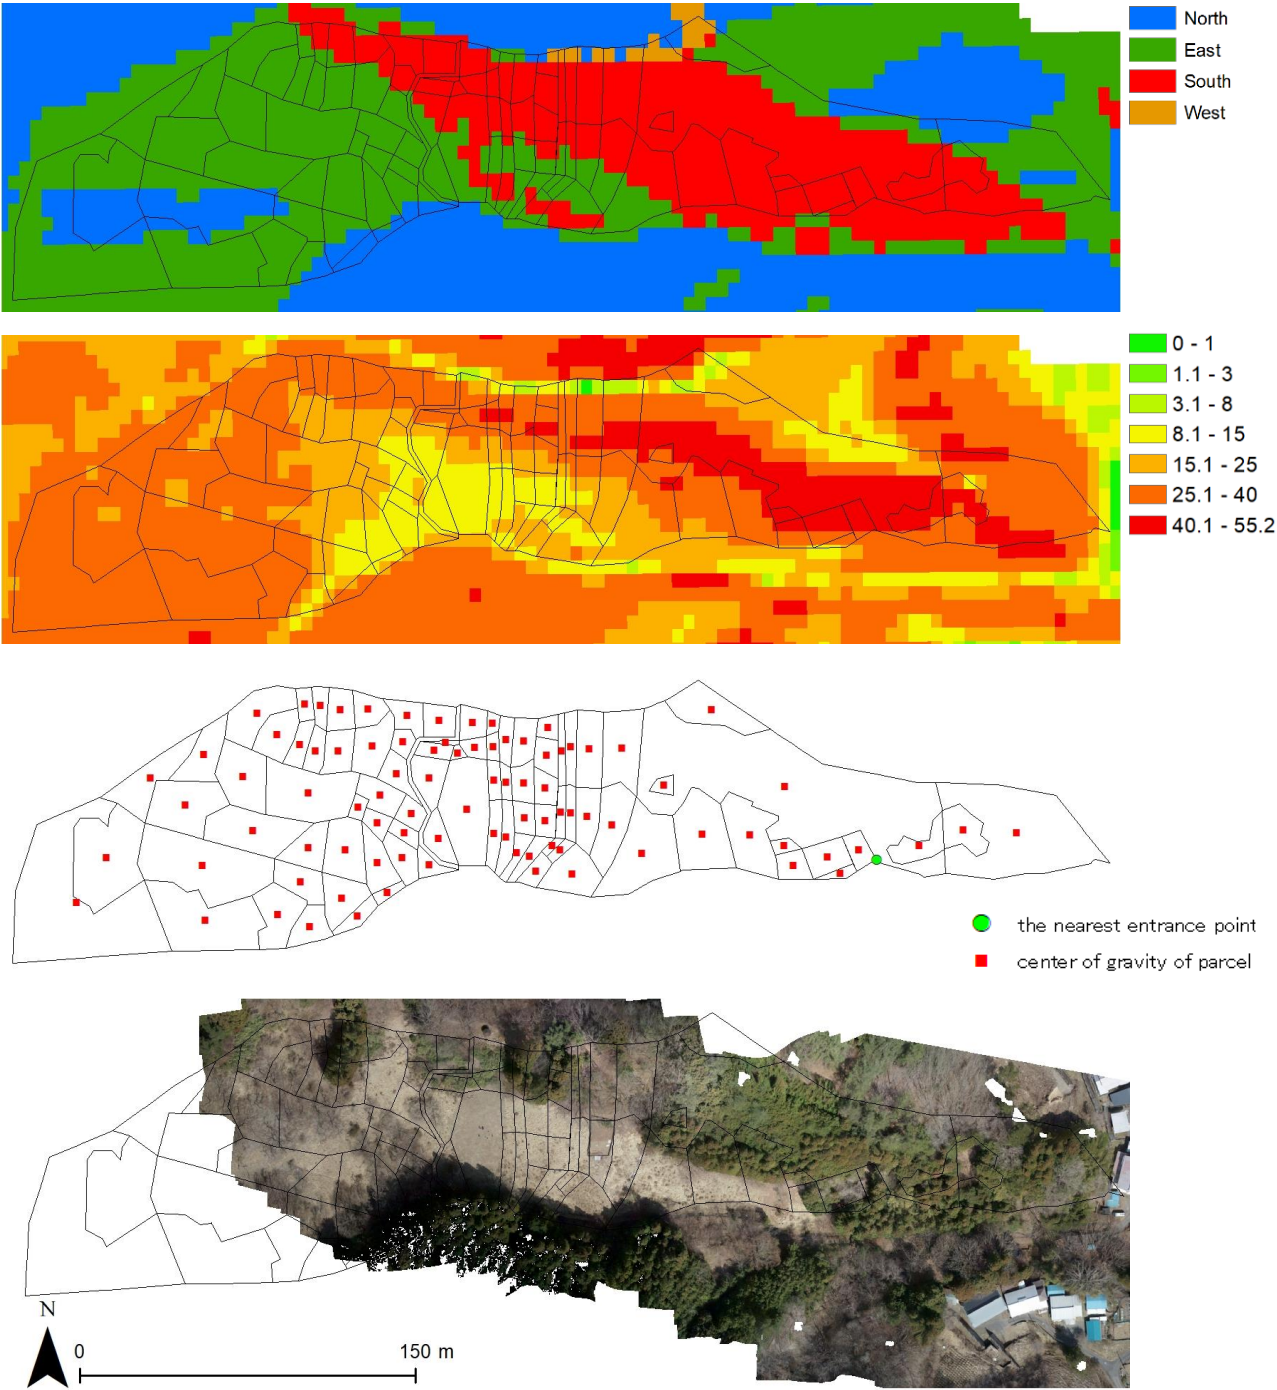

Figure S4. Continued.

b) HS (Hashidate)

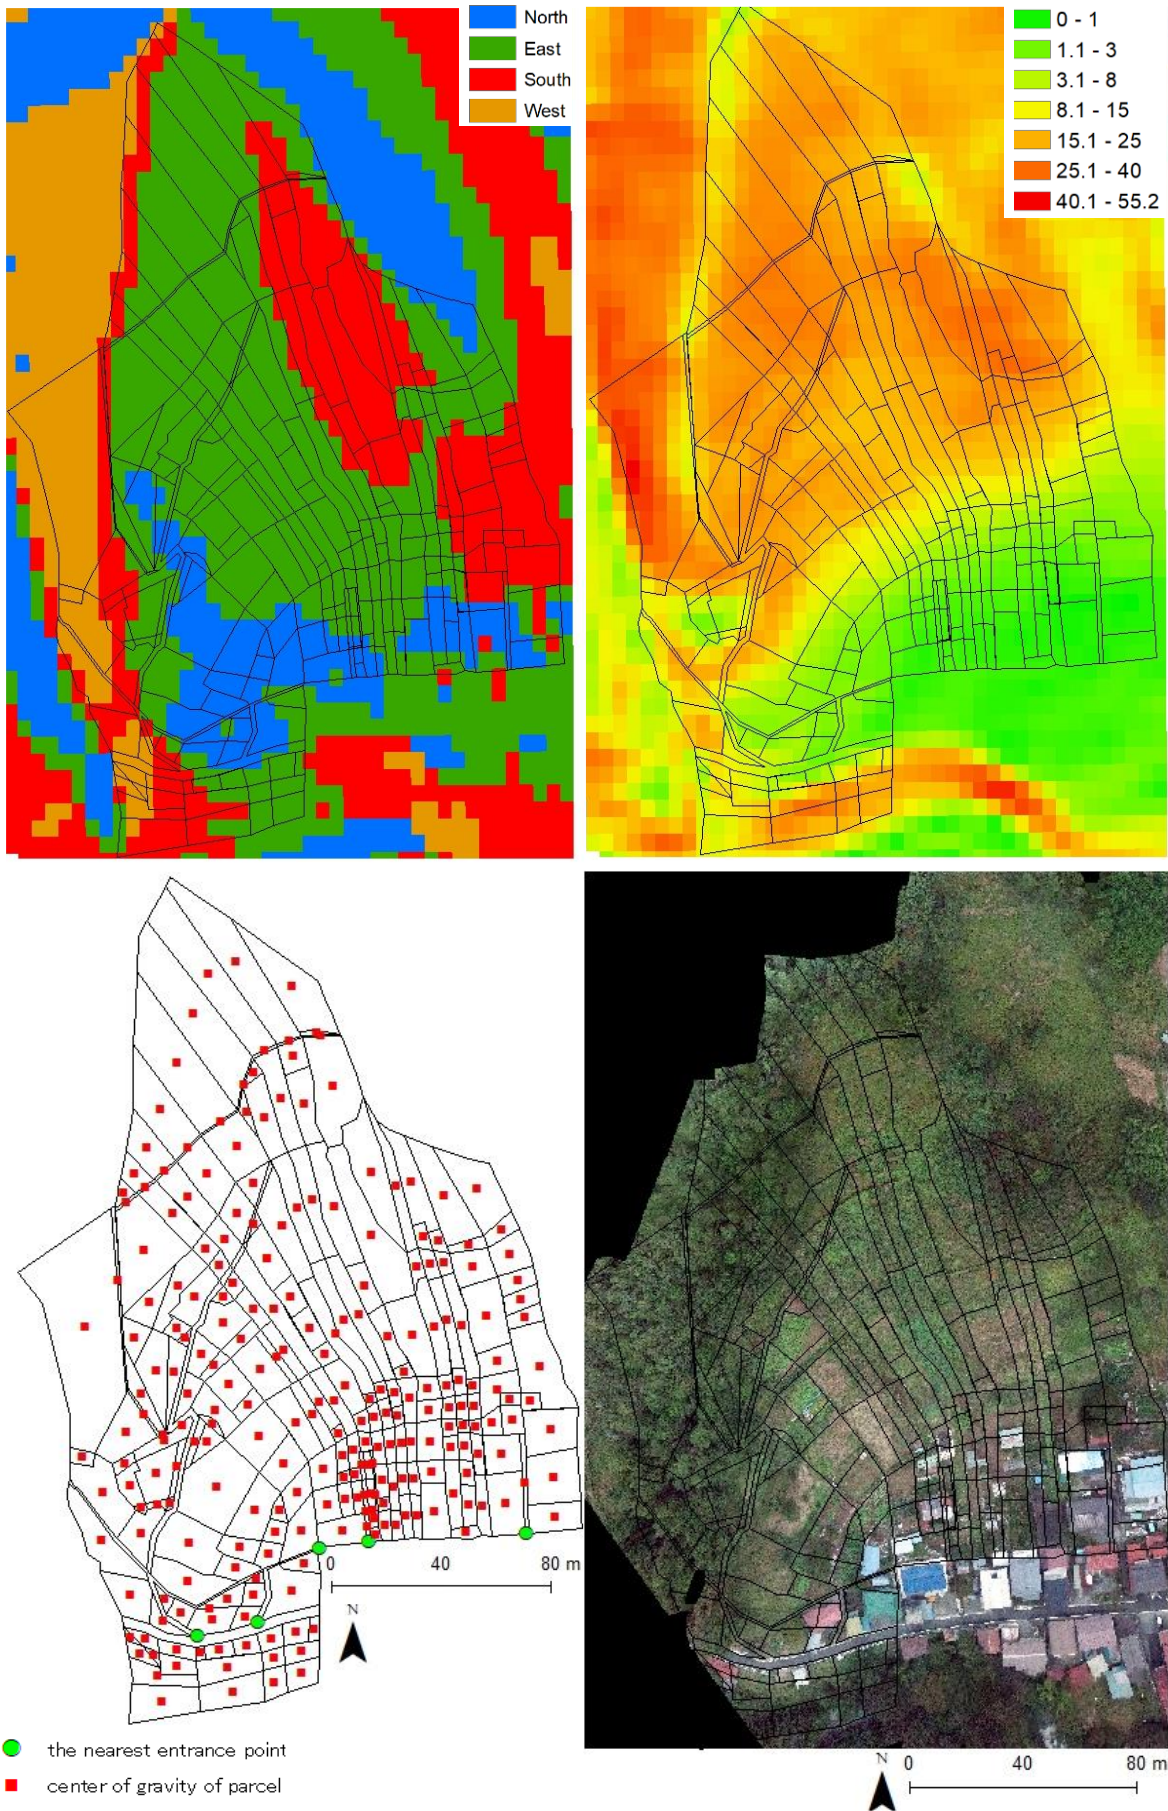



Figure S4. Continued.

c) SR (Shirasawa)

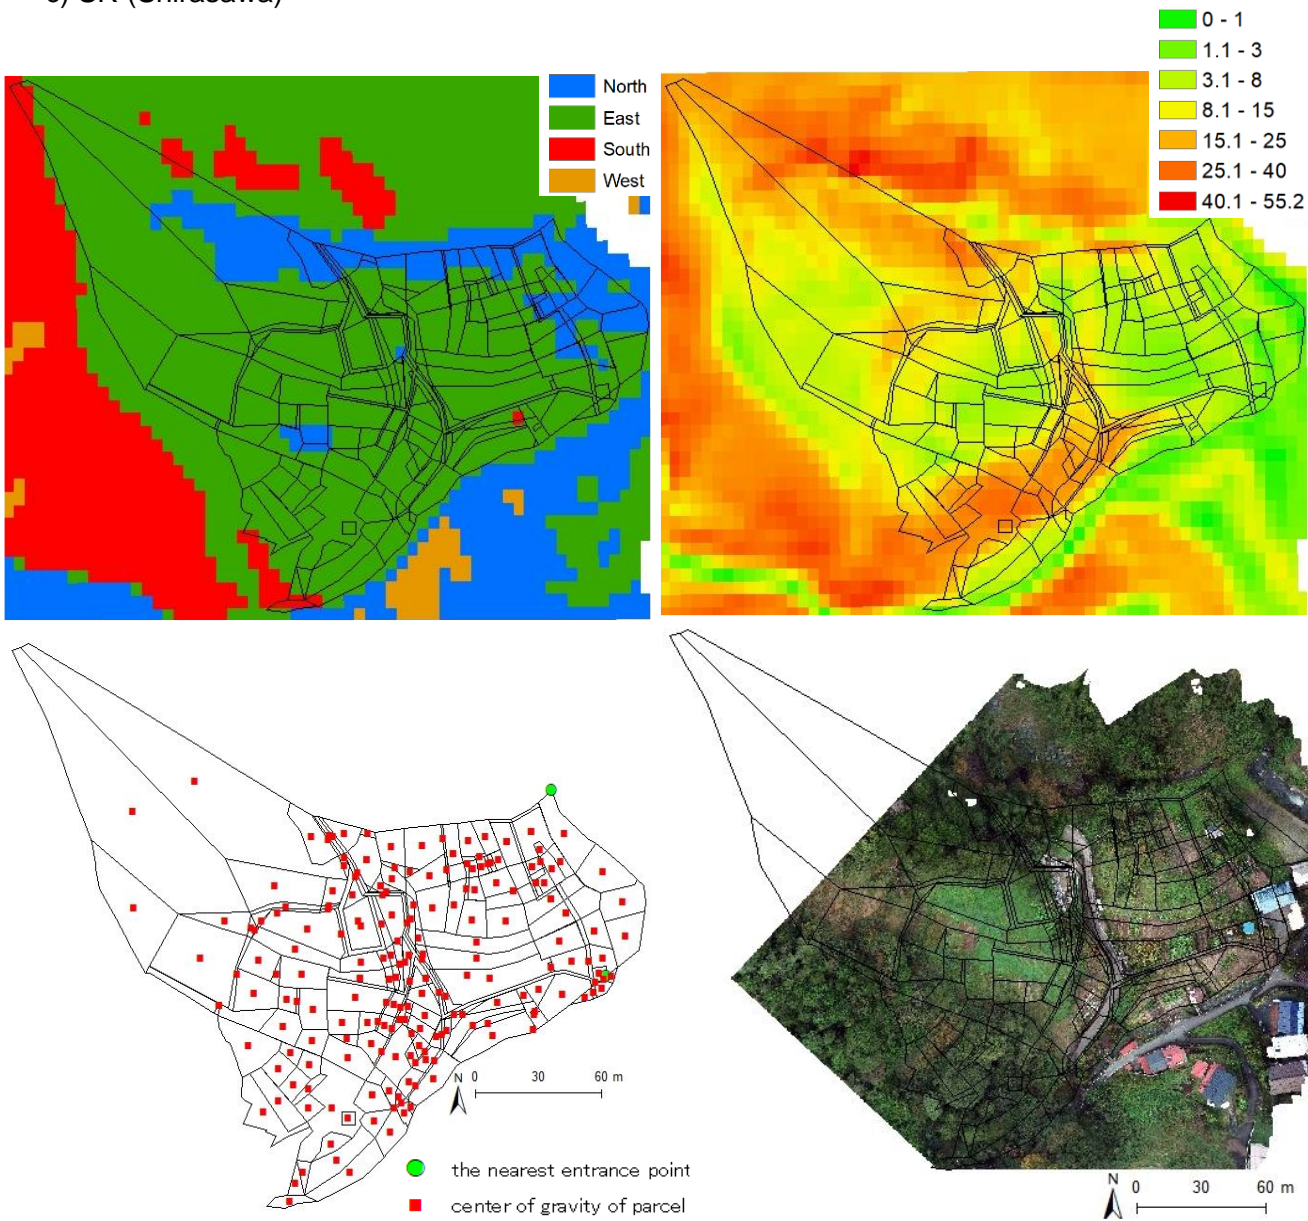



Figure S4. Continued.

d) NK (Nakagumi)

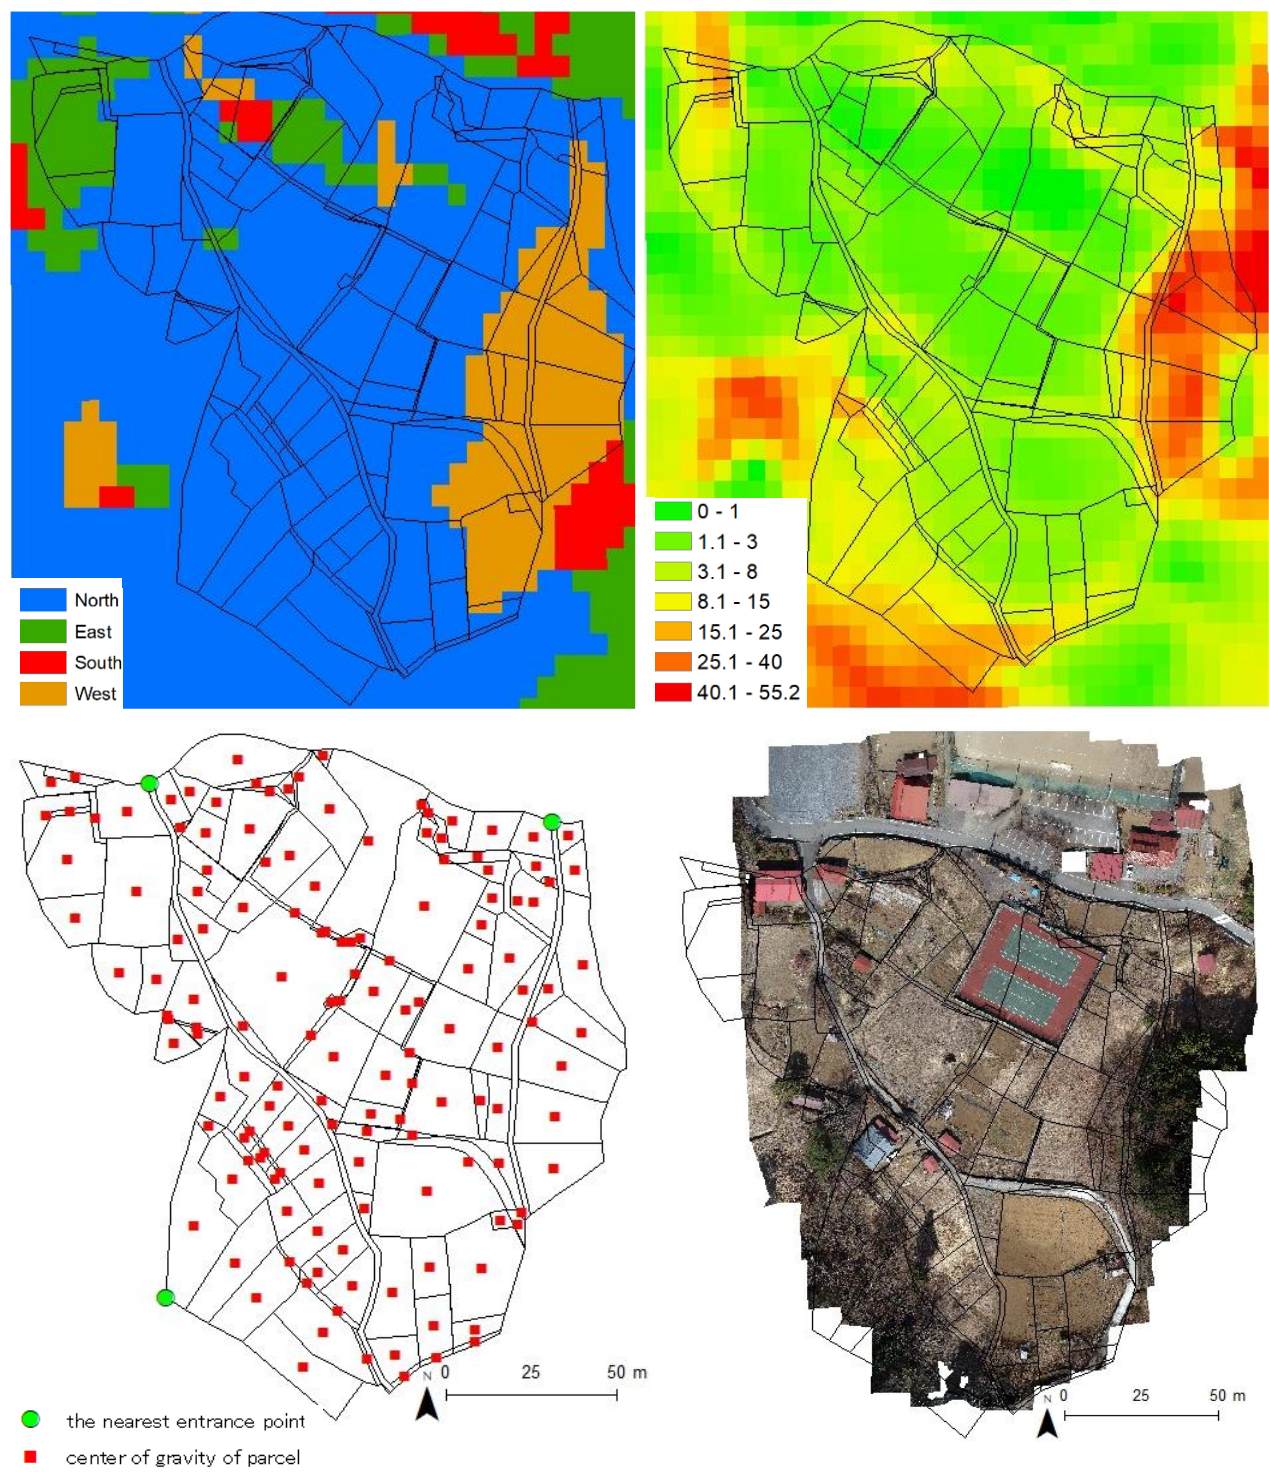

## **S1. References for Figure S3.**

57. Association of Agriculture & Forestry Statistics (1960-2010) Census of Agriculture and Forestry, 1962-2012, in Japanese.
58. Cabinet Office of Japan, ed. (1956-1965) Kokuzei Chousa Houkoku 19 Yamanashi Ken (Japan Statistical Yearbook no. 19 Yamanashi Prefecture), 1950-1963, in Japanese.
59. Kanto Regional Agricultural Administration Office (Yamanashi), Ministry of Agriculture, Forestry and Fisheries of Japan (MAFF), ed. (1996) Gunnai Chiku Shichoson Betsu Ruinen Tokei Sho (Statistical Yearbook by Municipality in Gunnai region), in Japanese.
60. Kanto Regional Agricultural Administration Office (Yamanashi), Ministry of Agriculture, Forestry and Fisheries of Japan (MAFF), ed. (2007) Yamanashi Ken Shichoson Betsu Norin Ruinen Tokei (Agriculture and Forestry statistics by Municipality of Yamanashi Prefecture), in Japanese.
61. Yamanashi Prefecture, ed. (1967-2018) Yamanashi Ken Tokei Nenkan (Statistical Yearbook of Yamanashi Prefecture), 1965-2015, in Japanese.
